# Supplementary material for: Functional and phylogenetic analysis of TetX variants to design a new classification system
Source: PubMed Central journal article supplement (PMC9156754; doi:10.1038/s42003-022-03465-y), 2022-05-31
Supplement: 42003_2022_3465_MOESM1_ESM.pdf [file 42003_2022_3465_MOESM1_ESM.pdf]

**Functional and phylogenetic analysis of TetX variants to design a new classification system**

Qipeng Cheng<sup>1,2,#</sup>, Yanchu Cheung<sup>2,#</sup>, Chenyu Liu<sup>2</sup>, Edward Wai Chi Chan<sup>1</sup>, Kwok Yin Wong<sup>1</sup>, Rong Zhang<sup>3</sup>, Sheng Chen<sup>2\*</sup>

<sup>1</sup>State Key Lab of Chemical Biology and Drug Discovery, Department of Applied Biology and Chemical Technology, The Hong Kong Polytechnic University, Hung Hom, Kowloon, Hong Kong.

<sup>2</sup>Department of Infectious Diseases and Public Health, Jockey Club College of Veterinary Medicine and Life Sciences, City University of Hong Kong, Kowloon, Hong Kong.

<sup>3</sup>Department of Clinical Laboratory, Second Affiliated Hospital of Zhejiang University, School of Medicine, Hangzhou 310009, People's Republic of China

# These authors contributed equally.

\*To whom correspondence should be addressed: Sheng CHEN, [shechen@cityu.edu.hk](mailto:shechen@cityu.edu.hk)

**Keywords:** TetX, Function, Evolution, Classification, Variants

**Supplementary Table 1. Primers used in this study.**

| Primer                               | Sequence                             |
|--------------------------------------|--------------------------------------|
| <i>tet</i> (X2)-F <sup>a</sup>       | CGCCATATGATGACAATGCGAATAGATACAG      |
| <i>tet</i> (X2)-R <sup>b</sup>       | CGCGGATCCTTATACATTTAACAATTGCTGAAAC   |
| <i>tet</i> (X3)-R                    | CGCGGATCCTTATAGATTCAATAATTTTTGAAACGA |
| <i>tet</i> (X4)-F                    | CGCCATATGATGAGCAATAAAGAAAAACAATG     |
| H <sup>196</sup> L-F                 | ATACAAGCCGATATTCTGCAACCAGAGATAAAC    |
| H <sup>196</sup> L-R                 | GTTTATCTCTGGTTGCAGAATATCGGCTTGAT     |
| Q <sup>197</sup> H-F                 | CAAGCCGATATTCATCATCCAGAGATAAACTGT    |
| Q <sup>197</sup> H-R                 | ACAGTTTATCTCTGGATGATGAATATCGGCTTG    |
| S <sup>217</sup> A-F                 | AACCGGCTAATGGCAGCACCAAGGTAATTTA      |
| S <sup>217</sup> A-R                 | TAAATTACCTTGGTGTGCTGCCATTAGCCGGTT    |
| S <sup>217</sup> G-F                 | AACCGGCTAATGGCAGGTCACCAAGGTAATTTA    |
| S <sup>217</sup> G-R                 | TAAATTACCTTGGTGACCTGCCATTAGCCGGTT    |
| H <sup>279</sup> R-F                 | TACAAAGAATTGATTCTGTACGACGTTGTCATTT   |
| H <sup>279</sup> R-R                 | AAATGACAACGTCGTACGAATCAATTCTTTGTA    |
| T <sup>280</sup> S-F                 | AAAGAATTGATTCATAGCACGTTGTCATTTGTA    |
| T <sup>280</sup> S-R                 | TACAAATGACAACGTGCTATGAATCAATTCTTT    |
| T <sup>280</sup> V-F                 | AAAGAATTGATTCATGTGACGTTGTCATTTGTA    |
| T <sup>280</sup> V-R                 | TACAAATGACAACGTACATGAATCAATTCTTT     |
| T <sup>280</sup> L-F                 | AAAGAATTGATTCATCTGACGTTGTCATTTGTA    |
| T <sup>280</sup> L-R                 | TACAAATGACAACGTACAGATGAATCAATTCTTT   |
| L <sup>282</sup> S-F                 | TTGATTCATACGACGAGCTCATTTGTAGGATTG    |
| L <sup>282</sup> S-R                 | CAATCCTACAAATGAGCTCGTCGTATGAATCAA    |
| E <sup>295</sup> N-F                 | CGGATATTTCTTTAAACAAGCCTTGAAAAAGC     |
| E <sup>295</sup> N-R                 | GCTTTTCCAAGGCTTGTTTAAAGGAAATATCCG    |
| E <sup>295</sup> G-F                 | CGGATATTTCTTTAGGAAAGCCTTGAAAAAGC     |
| E <sup>295</sup> G-R                 | GCTTTTCCAAGGCTTTCCTAAAGGAAATATCCG    |
| E <sup>295</sup> D-F                 | CGGATATTTCTTTAGATAAGCCTTGAAAAAGC     |
| E <sup>295</sup> D-R                 | GCTTTTCCAAGGCTTATCTAAAGGAAATATCCG    |
| K <sup>296</sup> N-F                 | ATATTTCTTTAGAAAACCCTTGAAAAAGCAAG     |
| K <sup>296</sup> N-R                 | CTTGCTTTTCCAAGGGTTTTCTAAAGGAAATAT    |
| P <sup>297</sup> D-F                 | TTTCTTTAGAAAAGGATTGGAAAAGCAAGCGC     |
| P <sup>297</sup> D-R                 | GCGCTTGCTTTTCCAATCCTTTTCTAAAGGAAA    |
| P <sup>297</sup> S-F                 | TTTCTTTAGAAAAGAGTTGGAAAAGCAAGCGC     |
| P <sup>297</sup> S-R                 | GCGCTTGCTTTTCCAACCTTTTCTAAAGGAAA     |
| V <sup>329</sup> L-F                 | GTAAATAGTGGGTTGCTGGATGCCTTGATATTG    |
| V <sup>329</sup> L-R                 | CAATATCAAGGCATCCAGCAACCCACTATTTAC    |
| V <sup>329</sup> M-F                 | GTAAATAGTGGGTTGATGGATGCCTTGATATTG    |
| V <sup>329</sup> M-R                 | CAATATCAAGGCATCCATCAACCCACTATTTAC    |
| A <sup>339</sup> T-F                 | TTGTCTGATAATCTAACCGATGGAAAATTTAAT    |
| A <sup>339</sup> T-R                 | ATTAAATTTTCCATCGGTTAGATTATCAGACAA    |
| D <sup>340</sup> N-F                 | TCTGATAATCTAGCCAATGGAAAATTTAATAGC    |
| D <sup>340</sup> N-R                 | GCTATTAAATTTTCCATTGGCTAGATTATCAGA    |
| V <sup>350</sup> I-F                 | AGCATTGAAGAGGCTATTAATAAATTATGAACAG   |
| V <sup>350</sup> I-R                 | CTGTTTATAATTTTTAATAGCCTCTTCAATGCT    |
| K <sup>351</sup> E-F                 | ATTGAAGAGGCTGTTGAAAATTATGAACAGCAA    |
| K <sup>351</sup> E-R                 | TTGCTGTTTATAATTTTCAACAGCCTCTTCAAT    |
| I <sup>359</sup> V-F                 | GAACAGCAAATGTTTGTATGGCAAAGAAGCA      |
| I <sup>359</sup> V-R                 | TGCTTCTTTGCCATAAACAAACATTTGCTGTTT    |
| I <sup>359</sup> M-F                 | GAACAGCAAATGTTTATGTATGGCAAAGAAGCA    |
| I <sup>359</sup> M-R                 | TGCTTCTTTGCCATACATAAACATTTGCTGTTT    |
| <i>tet</i> (X3)-L <sup>329</sup> V-F | GTAAATACGGGATTAGTGGATGCTTTGATATTG    |
| <i>tet</i> (X3)-L <sup>329</sup> V-R | CAATATCAAGGCATCCACTAATCCCGTATTAC     |

|                                                          |                                      |
|----------------------------------------------------------|--------------------------------------|
| <i>tet(X3)</i> -T <sup>339</sup> A/N <sup>340</sup> D -F | TTGTCTGAAAACCTTGCCGATGGAGAATTTACAAGT |
| <i>tet(X3)</i> -T <sup>339</sup> A/N <sup>340</sup> D -R | ACTTGTAATTCTCCATCGGCAAGGTTTTTCAGACAA |
| <i>tet(X3)</i> -I <sup>350</sup> V/E <sup>351</sup> K -F | AGTATTGAAAATGCCGTTAAAAACTACGAACAACAA |
| <i>tet(X3)</i> -I <sup>350</sup> V/E <sup>351</sup> K -R | TTGTTGTTTCGTAGTTTTTTAACGGCATTTCATACT |
| <i>tet(X4)</i> -M <sup>329</sup> V-F                     | GTAAACAGCGGGTTGGTGGATGCCTTGATATTG    |
| <i>tet(X4)</i> -M <sup>329</sup> V-R                     | CAATATCAAGGCATCCACCAACCCGCTGTTTAC    |
| <i>tet(X4)</i> -T <sup>339</sup> A/N <sup>340</sup> D -F | TTGTCGGATAATCTGGCCGATGGGAAATTTAACAGC |
| <i>tet(X4)</i> -T <sup>339</sup> A/N <sup>340</sup> D -R | GCTGTAAATTTCCCATCGGCCAGATTATCCGACAA  |
| <i>tet(X4)</i> -I <sup>350</sup> V/E <sup>351</sup> K -F | AGCATTGAAGAGGCTGTTAAAAATTATGAACAGCAA |
| <i>tet(X4)</i> -I <sup>350</sup> V/E <sup>351</sup> K -R | TTGCTGTTCATAATTTTTAACAGCCTCTTCAATGCT |

---

Note: <sup>a</sup> *tet(X2)*-F used for *tet(X3)* forward primer; <sup>b</sup> *tet(X2)*-R used for *tet(X4)* reverse primer.

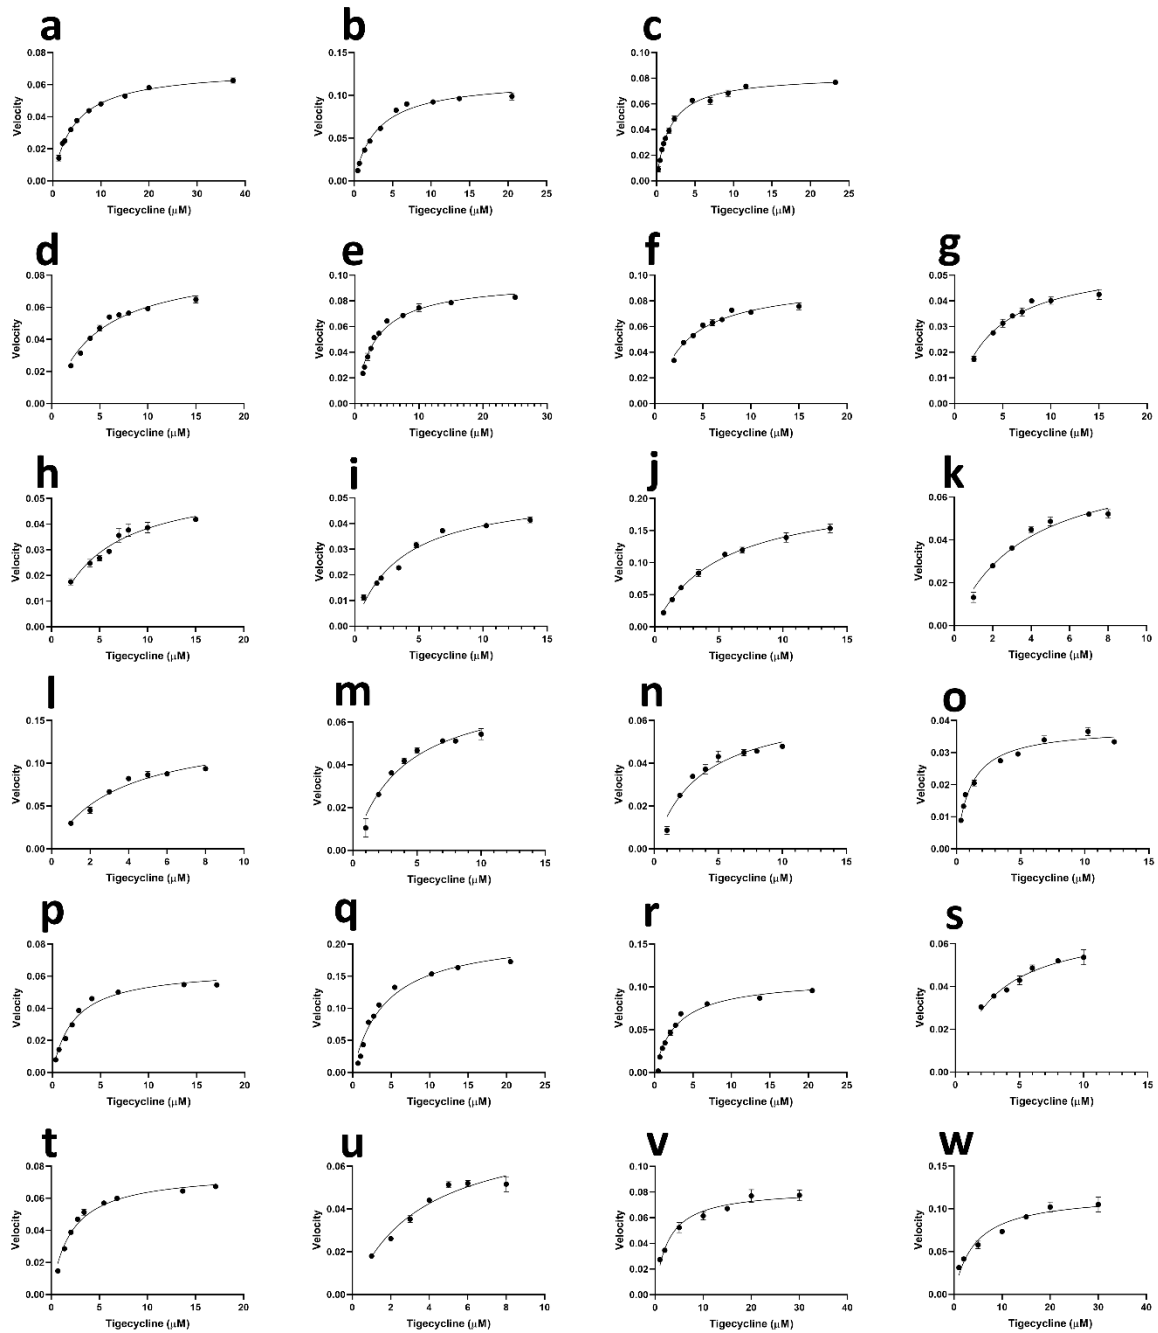

**Supplementary Figure 1. Michaelis–Menten plot of Tet(X) variants and mutants. a** Tet(X2), **b** Tet(X3), **c** Tet(X4), **d** S<sup>217</sup>A, **e** T<sup>280</sup>V, **f** T<sup>280</sup>S, **g** L<sup>282</sup>S, **h** E<sup>295</sup>N, **i** V<sup>329</sup>L, **j** V<sup>329</sup>M, **k** A<sup>339</sup>T, **l** K<sup>351</sup>E, **m** A<sup>339</sup>T/D<sup>340</sup>N, **n** V<sup>350</sup>K/I<sup>351</sup>E, **o** V<sup>329</sup>L/A<sup>339</sup>T/D<sup>340</sup>N, **p** V<sup>329</sup>L/V<sup>350</sup>I/K<sup>351</sup>E, **q** V<sup>329</sup>M/A<sup>339</sup>T/D<sup>340</sup>N, **r** V<sup>329</sup>M/V<sup>350</sup>I/K<sup>351</sup>E, **s** A<sup>339</sup>T/D<sup>340</sup>N/V<sup>350</sup>I/K<sup>351</sup>E, **t** V<sup>329</sup>L/A<sup>339</sup>T/D<sup>340</sup>N/V<sup>350</sup>I/K<sup>351</sup>E, **u** V<sup>329</sup>M/A<sup>339</sup>T/D<sup>340</sup>N/V<sup>350</sup>I/K<sup>351</sup>E, **v** Tet(X3)-L<sup>329</sup>V/T<sup>339</sup>A/N<sup>340</sup>D/I<sup>350</sup>V/E<sup>351</sup>K, **w** Tet(X4)-L<sup>329</sup>V/T<sup>339</sup>A/N<sup>340</sup>D/I<sup>350</sup>V/E<sup>351</sup>K.

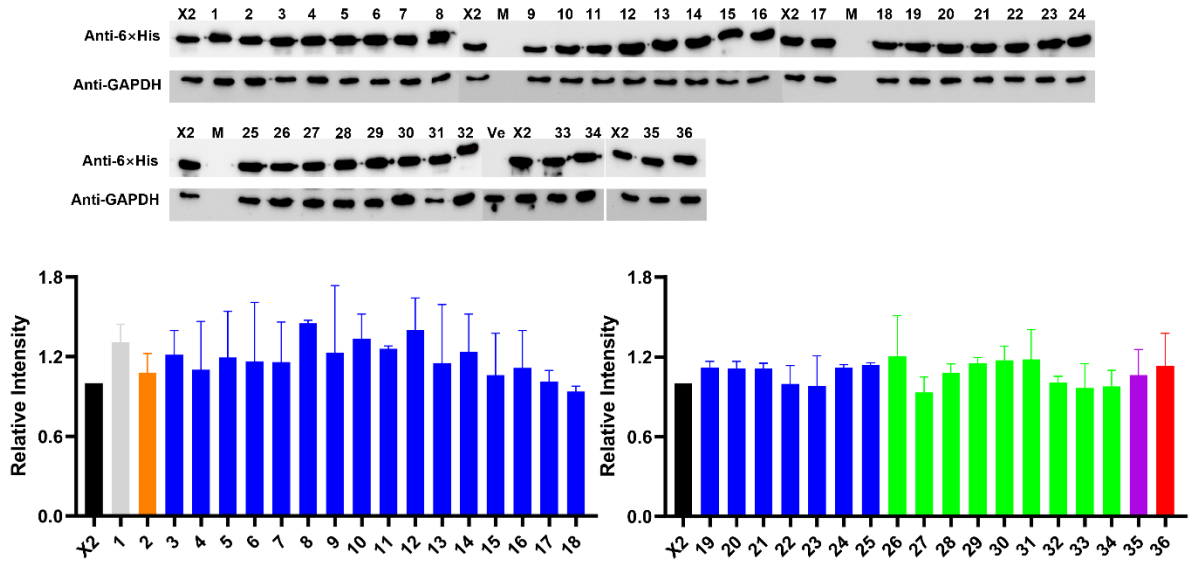

**Supplementary Figure 2 Protein expression levels of TetX variant and mutant enzymes.** M is the protein ladder, Ve is vector control, X2 is Tet(X2) as a positive control and shown in black. 1 is Tet(X3) and shown in grey, 2 is Tet(X4) and shown in orange, 3 is H<sup>196</sup>L, 4 is Q<sup>197</sup>H, 5 is S<sup>217</sup>A, 6 is S<sup>217</sup>G, 7 is H<sup>279</sup>R, 8 is T<sup>280</sup>V, 9 is T<sup>280</sup>L, 10 is T<sup>280</sup>S, 11 is L<sup>282</sup>S, 12 is E<sup>295</sup>G, 13 is E<sup>295</sup>N, 14 is E<sup>295</sup>D, 15 is K<sup>296</sup>N, 16 is P<sup>297</sup>D, 17 is P<sup>297</sup>S, 18 is I<sup>359</sup>M, 19 is I<sup>359</sup>V, 20 is V<sup>329</sup>L, 21 is V<sup>329</sup>M, 22 is A<sup>339</sup>T, 23 is D<sup>340</sup>N, 24 is V<sup>350</sup>I, 25 is K<sup>351</sup>E, 26 is A<sup>339</sup>T/D<sup>340</sup>N, 27 is V<sup>350</sup>I/K<sup>351</sup>E, 28 is V<sup>329</sup>L/A<sup>339</sup>T/D<sup>340</sup>N, 29 is V<sup>329</sup>L/V<sup>350</sup>I/K<sup>351</sup>E, 30 is V<sup>329</sup>M/A<sup>339</sup>T/D<sup>340</sup>N, 31 is V<sup>329</sup>M/V<sup>350</sup>I/K<sup>351</sup>E, 32 is A<sup>339</sup>T/D<sup>340</sup>N/V<sup>350</sup>I/K<sup>351</sup>E, 33 is V<sup>329</sup>L/A<sup>339</sup>T/D<sup>340</sup>N/V<sup>350</sup>I/K<sup>351</sup>E, 34 is V<sup>329</sup>M/A<sup>339</sup>T/D<sup>340</sup>N/V<sup>350</sup>I/K<sup>351</sup>E, 35 is Tet(X3)-L<sup>329</sup>V/T<sup>339</sup>A/N<sup>340</sup>D/I<sup>350</sup>V/E<sup>351</sup>K and shown in purple, 36 is Tet(X4)-M<sup>329</sup>V/T<sup>339</sup>A/N<sup>340</sup>D/I<sup>350</sup>V/E<sup>351</sup>K and shown in red. Single mutants are in blue and multiple mutants are in green. Band intensities from two independent experiments were used to plot the bar graph.

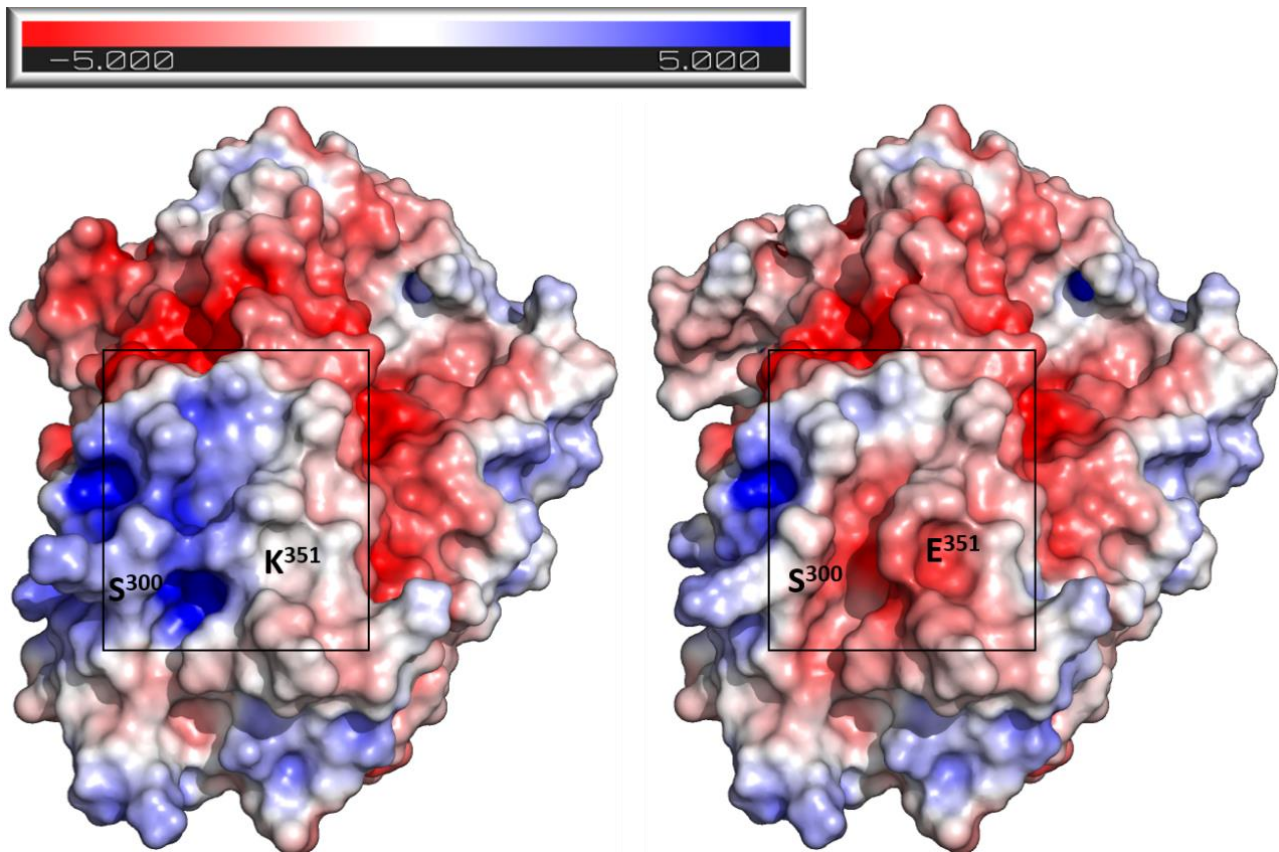

**Supplementary Figure 3. Electrostatic potential map of Tet(X2) and the corresponding mutants carrying the V<sup>329</sup>M/A<sup>339</sup>T/D<sup>340</sup>N/V<sup>350</sup>I/K<sup>351</sup>E amino acid changes.** The area between Loop 5 and C terminal  $\alpha$  helix is marked by a black rectangle. The color change from red to blue reflects a shift of electrostatic potential from negative to positive.

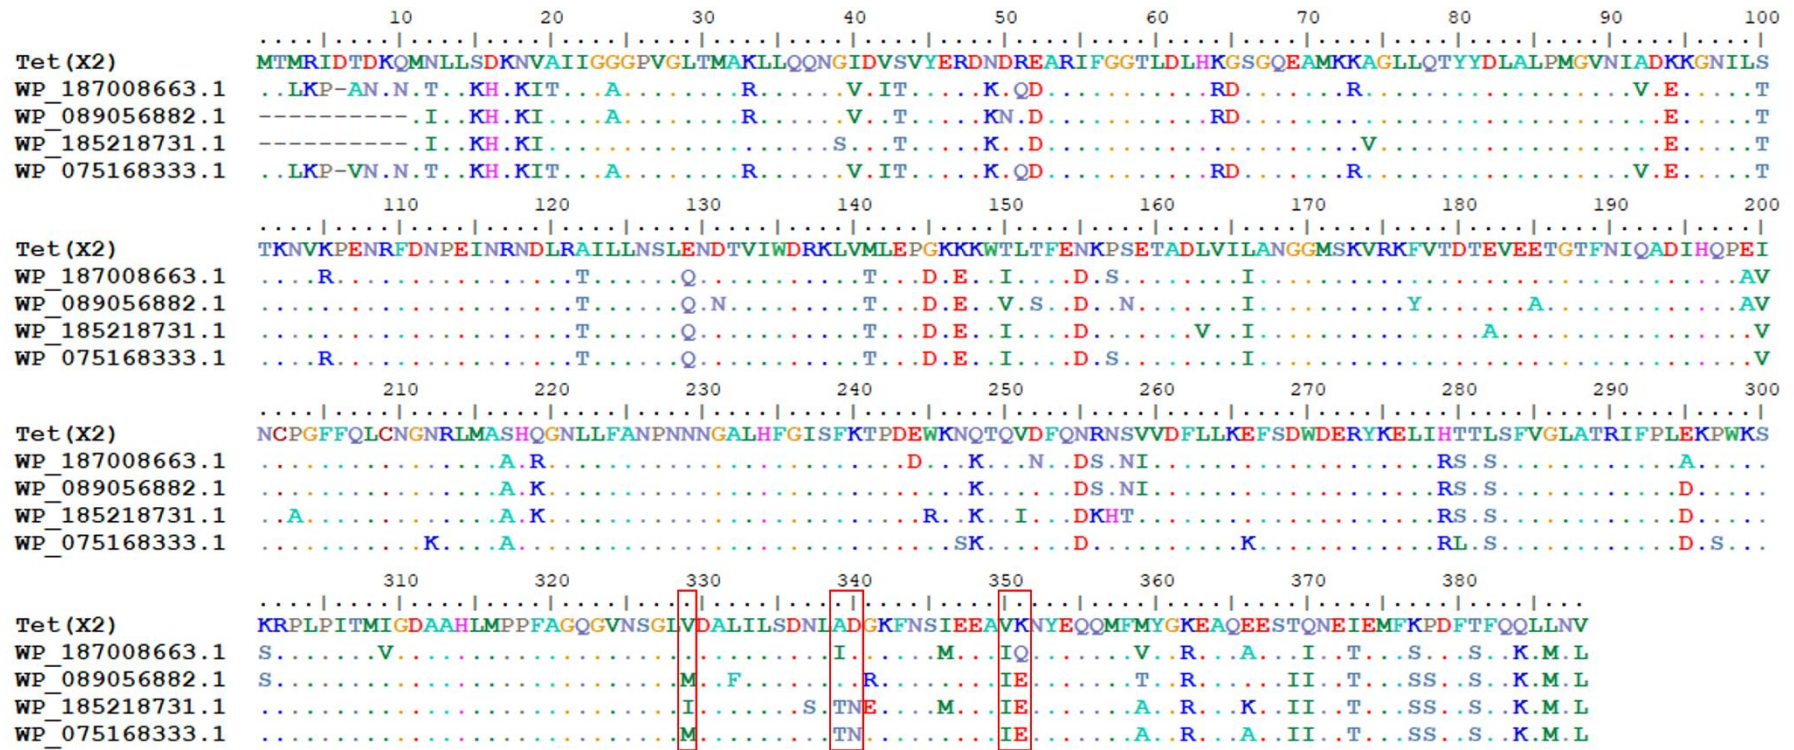

Supplementary Figure 4. Multiple alignment for WP\_187008663.1, WP\_089056882.1, and WP\_185218731.1 with the variant (WP\_075168333.1) of the Tet(X4) class in the same branch.

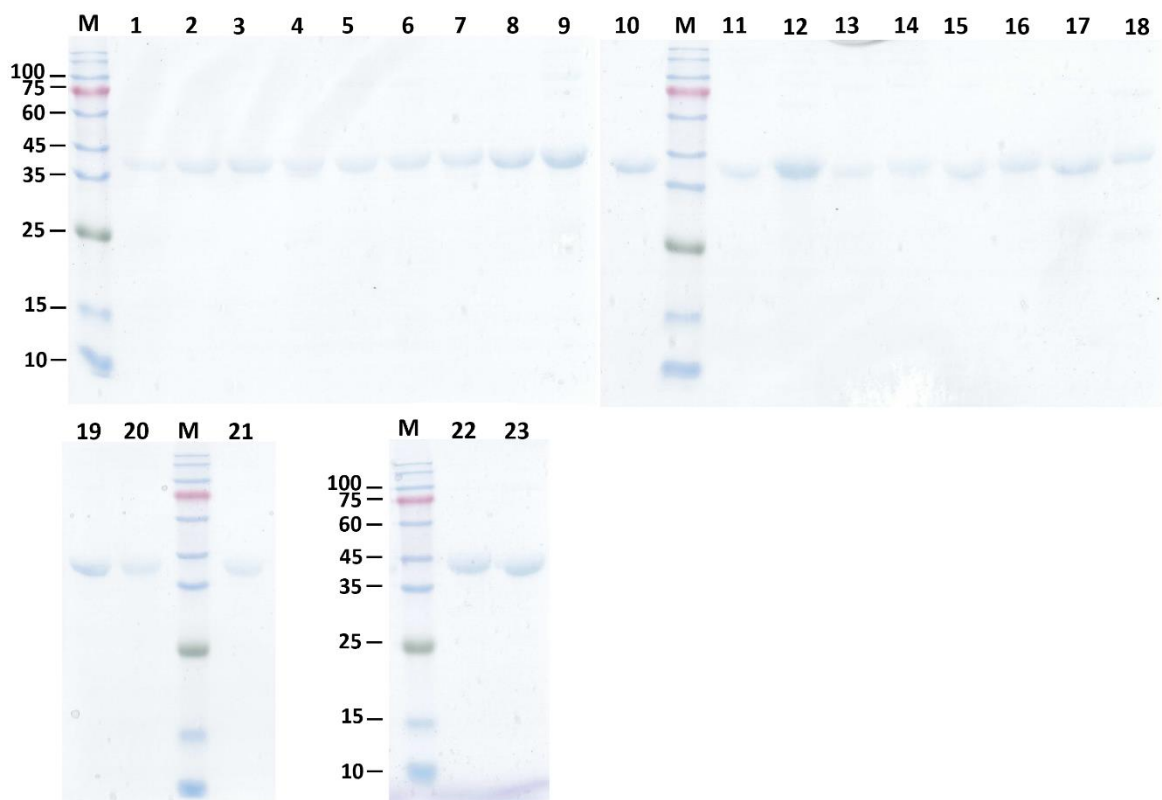

**Supplementary Figure 5. SDS-PAGE analyses of recombinant TetX variants and mutants.**

**M** protein ladder, **1** Tet(X2), **2** Tet(X3), **3** Tet(X4), **4** S<sup>217</sup>A, **5** T<sup>280</sup>V, **6** T<sup>280</sup>S, **7** L<sup>282</sup>S, **8** E<sup>295</sup>N, **9** V<sup>329</sup>L, **10** V<sup>329</sup>M, **11** A<sup>339</sup>T, **12** K<sup>351</sup>E, **13** A<sup>339</sup>T/D<sup>340</sup>N, **14** V<sup>350</sup>K/I<sup>351</sup>E, **15** V<sup>329</sup>L/A<sup>339</sup>T/D<sup>340</sup>N, **16** V<sup>329</sup>L/V<sup>350</sup>I/K<sup>351</sup>E, **17** V<sup>329</sup>M/A<sup>339</sup>T/D<sup>340</sup>N, **18** V<sup>329</sup>M/V<sup>350</sup>I/K<sup>351</sup>E, **19** A<sup>339</sup>T/D<sup>340</sup>N/V<sup>350</sup>I/K<sup>351</sup>E, **20** V<sup>329</sup>L/A<sup>339</sup>T/D<sup>340</sup>N/V<sup>350</sup>I/K<sup>351</sup>E, **21** V<sup>329</sup>M/A<sup>339</sup>T/D<sup>340</sup>N/V<sup>350</sup>I/K<sup>351</sup>E, **22** Tet(X3)-L<sup>329</sup>V/T<sup>339</sup>A/N<sup>340</sup>D/I<sup>350</sup>V/E<sup>351</sup>K, **23** Tet(X4)-L<sup>329</sup>V/T<sup>339</sup>A/N<sup>340</sup>D/I<sup>350</sup>V/E<sup>351</sup>K.
